# Supplementary material
Source: HighWire-hosted journal article supplement (doi:10.1101/rna.079796.123)
Supplement: Supplemental_Materials.docx [file Supplemental_Materials.docx]

Supplementary Materials for

**High-resolution RNA tertiary structures in Zika virus stem-loop A for the development of inhibitory small molecules**

Jerricho Tipo1, Keerthi Gottipati2,3, and Kyung H. Choi2,3*

1Department of Pharmacology and Toxicology and Sealy Center for Structural Biology, The University of Texas Medical Branch, Galveston, TX 77555, USA

2Department of Biochemistry and Molecular Biology, Sealy Center for Structural Biology, The University of Texas Medical Branch, Galveston, TX 77555, USA

3Department of Molecular and Cellular Biochemistry, Indiana University, Bloomington, IN 47405, USA

*To whom correspondence should be addressed. Tel:812-855-1159; Email: [kaychoi@iu.edu](mailto:kychoi@utmb.edu)

This file includes:

Figs. S1 to S2

Tables S1 to S3

**Figure S1. G•C-G base triple interactions identified using WebFr3D.** **(A)** Overlay of the six structurally similar G•C-G base triples. The search parameters and query results are included in the table to the right. **(B)** Four of six G•C-G base triples (PDB codes of4LFB,5T5A, 5K7D, and3NPQ) show stabilization along the Watson and Crick edge of G7 bulge. The G bulge in T-S ribozyme (5T5A) show a similar three-pronged interaction as the top stem G7 bulge (site 1), where polar atoms along the Watson-Crick edge are further stabilized by interactions with a magnesium ion and the phosphate backbone of a neighboring adenine nucleotide.

**Figure S2. Small molecules identified using PubChem similarity search**. SMILES information of the five Inforna-identified compounds were used to identify structurally similar compounds by PubChem. The chemical structure and SMILES notation of five compounds that were manually selected are shown.

**Table S1. Bottom stem (ssRNA and dsRNA) superposition**

| **ssRNA chain** | | **dsRNA stem** | | **dsRNA stem (excluding 14GUA16)** | |
| --- | --- | --- | --- | --- | --- |
| chain | A / B | site | 1 / 2 | site | 1 / 2 |
| Total no. of atoms | 400 | Total no. of atoms | 271 | Total no. of atoms | 206 |
| RMS Deviation (Å) | 1.79 | RMS Deviation (Å) | 1.56 | RMS Deviation (Å) | 0.70 |

**Table S2. Top stem (ssRNA and dsRNA) superposition**

| **ssRNA chain** | | | | | | |
| --- | --- | --- | --- | --- | --- | --- |
| chain | A / B | A / C | A / D | B / C | B / D | C / D |
| Total no. of atoms | 522 | 532 | 521 | 522 | 521 | 521 |
| RMS Deviation (Å) | 2.72 | 3.32 | 3.00 | 2.63 | 2.15 | 1.57 |
| **dsRNA stem** | | | | | | |
| site | 1 / 2 | 1 / 3 | 1 / 4 | 2 / 3 | 2 / 4 | 3 / 4 |
| Total Atoms | 393 | 403 | 392 | 393 | 392 | 392 |
| RMS Deviation (Å) | 2.04 | 2.30 | 1.71 | 1.52 | 0.93 | 1.25 |
| **dsRNA stem (excluding 6UGC8)** | | | | | | |
| site | 1 / 2 | 1 / 3 | 1 / 4 | 2 / 3 | 2 / 4 | 3 / 4 |
| Total Atoms | 340 | 340 | 340 | 340 | 340 | 340 |
| RMS Deviation (Å) | 1.77 | 1.09 | 1.52 | 1.10 | 0.75 | 0.89 |

**Table S3. Superposition of bottom and top stem sites onto full-length ZIKV SLA**

| **Bottom stem** | | | **Top stem** | | | |
| --- | --- | --- | --- | --- | --- | --- |
| site | 1 | 2 | 1 | 2 | 3 | 4 |
| Total no. of atoms | 271 | 271 | 403 | 393 | 403 | 392 |
| RMS Deviation (Å) | 2.92 | 1.93 | 1.73 | 1.98 | 2.33 | 1.45 |
| **Bottom stem (excluding GUA)*** | | | **Top stem (excluding UGC)**** | | | |
| site | 1 | 2 | 1 | 2 | 3 | 4 |
| Total no. of atoms | 206 | 206 | 340 | 340 | 340 | 340 |
| RMS Deviation (Å) | 0.91 | 1.00 | 1.40 | 1.64 | 1.39 | 1.27 |

*The GUA in the isolated bottom stem (residues 14-16) and the full-length ZIKV SLA (residues 63-65) were omitted for superposition.

**The UGC in the isolated top stem (residues 6-8) and the full-length ZIKV SLA (residues 27-29) were omitted for superposition.
